# Supplementary material
Source: MDPI journal article supplement (https://www.mdpi.com/1424-2818/14/5/366)
Supplement: s1 [file s1]

---

**Supplementary Table S1.**

Species checklist of (I) Macroalgae (excluding most crustose coralline algae), (II) Seagrasses, (III) Invertebrates, and (IV) Bony and Cartilaginous Fishes documented from Blue Cavern Onshore SMCA (n = 1091 species total). The abbreviations sp. and spp. indicate that an individual or group of species within a genus were either unidentified or have yet to be described. Taxa organized alphabetically by phylum and class (columns organized top to bottom, left to right). Superscripted letters indicate the following:  
<sup>a</sup> Nonindigenous species; <sup>b</sup> Species range shift; <sup>c</sup> Species of concern; <sup>d</sup> Endangered species; <sup>e</sup> Critically endangered species; <sup>f</sup> Identification based on morphology; <sup>g</sup> New taxon added to checklist.

---

**I. Macroalgae****Chlorophyta: Ulvophyceae**

*Bryopsis corticulans*  
*Chaetomorpha aerea*  
*Chaetomorpha spiralis*  
*Cladophora* spp.  
*Cladophora graminea*  
<sup>g</sup>*Cladophora columbiana*  
*Cladophora microcladioides*  
*Cladophoropsis fasciculata*  
<sup>g</sup>*Codium simulans*  
*Codium dawsonii*

*Codium fragile* subsp.  
*californicum*  
*Codium hubbsii*  
*Codium johnstonei*  
*Codium setchellii*  
*Derbesia marina*  
*Kornmannia* spp.  
*Monostroma* spp.  
*Ulva* spp.  
*Ulva californica*  
<sup>g</sup>*Ulva flexuosa*  
*Ulva intestinalis*  
*Ulva lobata*  
*Urospora penicilliformis*

**Ochrophyta: Phaeophyceae**

*Acinetospora nicholsoniae*  
*Coilodesme corrugata*  
*Coilodesme rigida*  
*Colpomenia* spp.  
<sup>a</sup>*Colpomenia peregrina*  
*Colpomenia sinuosa*  
*Desmarestia viridis*  
*Dictyopteris undulata*  
*Dictyota binghamiae*  
*Dictyota coriacea*  
*Dictyota flabellata*  
*Ecklonia arborea*  
<sup>g</sup>*Ectocarpus* sp.  
*Ectocarpus corticulatus*  
*Egregia menziesii*  
*Feldmannia globifera*  
<sup>g</sup>*Feldmannia mitchelliae*  
*Hapterophycus canaliculatus*  
<sup>g</sup>*Hincksia* spp.  
*Hincksia granulosa*  
*Hydroclathrus clathratus*  
*Kuckuckia catalinae*

*Laminaria farlowii*  
<sup>g</sup>*Laminaria setchellii*  
*Leathesia* spp.  
*Macrocystis pyrifera*  
<sup>a</sup>*Mutimo cylindricus*  
*Neoagarum fimbriatum*  
<sup>g</sup>*Nereocystis leutkeana*  
*Pelagophycus porra*  
*Pelvetiopsis californica*  
*Petalonia* spp.  
*Petalonia binghamiae*  
*Petalonia fascia*  
*Petrospongium rugosum*  
*Phaeostrophion* spp.  
*Pseudolithoderma nigrum*  
<sup>g</sup>*Pterygophora californica*  
*Ralfsia* spp.  
*Sargassum agardhianum*  
<sup>a</sup>*Sargassum horneri*  
<sup>a</sup>*Sargassum muticum*  
*Sargassum palmeri*  
*Scytosiphon* spp.  
*Scytosiphon dotyi*  
*Scytosiphon lomentaria*  
*Silvetia compressa*  
*Sphacelaria* spp.  
*Sphacelaria rigidula*  
*Sporochnus pedunculatus*  
*Stephanocystis dioica*  
*Stephanocystis neglecta*  
*Stephanocystis osmundacea*  
<sup>g</sup>*Stephanocystis setchellii*  
*Taonia lennebackerae*  
*Zonaria farlowii*

**Rhodophyta: Bangiophyceae**

<sup>g</sup>*Porphyra* spp.  
*Porphyrella californica*

<sup>g</sup>*Pyropia perforata*

**Rhodophyta:****Compsopogonophyceae**

*Erythrotrichia welwitschii*

**Rhodophyta: Florideophyceae**

<sup>g</sup>*Acrochaetium* sp.  
*Acrosorium ciliolatum*  
*Amphiroa beauvoisii*  
<sup>g</sup>*Amplisiphonia pacifica*  
*Anisocladella pacifica*  
<sup>g</sup>*Antithamnion nipponicum*  
*Asparagopsis taxiformis*  
*Bonnemaisonia hamifera*  
*Bossiella* spp.  
*Bossiella dichotoma*  
*Bossiella orbigniana*  
*Botryocladia pseudodichotoma*  
<sup>g</sup>*Calliarthron* spp.  
*Calliarthron cheilosporioides*  
*Calliarthron tuberculosum*  
*Callithamnion rupicola*  
*Callophyllis* spp.  
<sup>g</sup>*Callophyllis violacea*  
*Carpopeltis bushiae*  
<sup>a</sup>*Caulacanthus okamurae*  
*Caulacanthus ustulatus*  
*Centroceras* spp.  
*Centroceras clavulatum*  
*Ceramium* spp.  
*Ceramium codicola*  
*Ceramium sinicola*  
*Chondracanthus canaliculatus*  
*Chondracanthus spinosus*  
*Chondria acrorhizophora*  
*Choreonema thuretii*  
*Colaonema daviesii*

*Corallina* spp.  
*Corallina officinalis* var. *chilensis*  
*Corallina vancouveriensis*  
*Corallophila* spp.  
*Corallophila eatoniana*  
<sup>§</sup>*Coriophyllum expansum*  
<sup>§</sup>*Cryptonemia borealis*  
<sup>§</sup>*Cryptonemia obovata*  
*Cryptopleura* spp.  
*Cryptopleura crispa*  
*Cryptopleura peltata*  
*Cryptopleura ramosa*  
<sup>§</sup>*Cumagloia andersonii*  
*Endocladia muricata*  
*Erythrocytis saccata*  
*Gastroclonium parvum*  
*Gelidium* spp.  
*Gelidium coulteri*  
*Gelidium nudifrons*  
*Gelidium purpurascens*  
*Gelidium pusillum*  
*Gelidium robustum*  
*Gloiocladia laciniata*  
*Gloiopeltis furcata*  
*Gracilaria armata*  
*Gracilaria pacifica*  
<sup>§</sup>*Gracilaria robusta*  
*Gracilariopsis longissima*  
<sup>§</sup>*Grateloupia filicina*  
<sup>§</sup>*Halymenia* spp.  
*Herposiphonia littoralis*  
*Herposiphonia plumula* var. *parva*  
<sup>§</sup>*Herposiphonia verticillata*  
*Hildenbrandia* spp.  
*Hymenena* spp.  
*Hypnea johnstonii*  
*Hypnea valentiae*  
*Jania adhaerens*

<sup>§</sup>*Jania capillacea*  
*Jania rosea*  
*Jania tenella*  
<sup>§</sup>*Jania verrucosa*  
<sup>§</sup>*Kallymenia* sp.  
<sup>§</sup>*Laurencia gardneri*  
*Laurencia pacifica*  
*Laurencia snyderae*  
*Laurencia subopposita*  
*Liagora californica*  
*Lithophyllum dispar*  
*Lithophyllum imitans*  
*Lithophyllum proboscideum*  
*Lithothamnion* sp.  
<sup>†</sup>*Lithothamnion australe*  
*Lithothrix aspergillum*  
<sup>§</sup>*Lomentaria* sp.  
<sup>§</sup>*Maripelta rotata*  
<sup>§</sup>*Mastocarpus* spp.  
*Mazzaella affinis*  
*Mazzaella leptorhynchus*  
*Melanosiphon* spp.  
<sup>§</sup>*Melanothamnus harveyi*  
<sup>§</sup>*Melanothamnus johnstonii*  
*Melanothamnus savatieri*  
<sup>§</sup>*Melanothamnus simplex*  
<sup>§</sup>*Mesophyllum lamellatum*  
*Microcladia coulteri*  
*Nemalion elminthoides*  
*Neogastroclonium subarticulatum*  
*Nienburgia andersoniana*  
*Osmundea sinicola*  
*Osmundea spectabilis*  
*Osmundea spectabilis* var. *diegoensis*  
*Osmundea splendens*  
<sup>a</sup>*Pachymeniopsis lanceolata*  
<sup>§</sup>*Petroglossum parvum*

*Peyssonnelia* spp.  
*Pikea californica*  
*Pleonosporium* spp.  
*Plocamium pacificum*  
*Plocamium violaceum*  
*Polysiphonia* spp.  
*Polysiphonia acuminata*  
*Polysiphonia mollis*  
*Polysiphonia pacifica* var. *delicatula*  
*Polysiphonia scopulorum* var. *villum*  
<sup>§</sup>*Polysiphonia villum*  
*Pterochondria woodii*  
<sup>§</sup>*Pterocladia caloglossoides*  
*Pterocladia capillacea*  
<sup>§</sup>*Pterocladia media*  
*Prionitis linearis*  
<sup>§</sup>*Pugetia fragilissima*  
<sup>§</sup>*Reticulobotrys catalinae*  
<sup>§</sup>*Rhodoptilum plumosum*  
*Rhodymenia californica*  
*Rhodymenia pacifica*  
<sup>§</sup>*Salishia firma*  
*Sarcoditheca gaudichaudii*  
<sup>§</sup>*Schizymenia* spp.  
<sup>§</sup>*Schizymenia pacifica*  
<sup>§</sup>*Sciadophycus stellatus*  
*Scinaia johnstoniae*  
*Spyridia filamentosa*  
<sup>§</sup>*Sorella delicatula*  
*Sorella pinnata*  
<sup>§</sup>*Stenogramma californicum*  
*Symphyocladia baileyi*  
*Symphyocladia dendroidea*  
*Tiffaniella snyderae*  
*Vertebrata hendryi*  
*Xiphosiphonia pennata*

## II. Seagrasses

### Tracheophyta: Magnoliopsida

*Phyllospadix torreyi*  
*Zostera marina*

## III. Invertebrates

### Annelida: Polychaeta

<sup>§</sup>*Alciopini* sp.  
*Amaeana occidentalis*  
<sup>§</sup>*Arabella semimaculata*  
*Brachysyllis lagunae*  
<sup>§</sup>*Brania* sp.  
*Capitella capitata*  
*Ceratonereis paucidentata*  
*Chaetopterus dewysee*  
*Chaetopterus variopedatus*  
<sup>§</sup>*Chrysopetalum occidentale*  
*Diopatra ornata*  
*Dodecaceria fewkesi*  
*Euclymeninae* sp.  
<sup>§</sup>*Eunoe* sp.  
<sup>§</sup>*Exogone* sp.  
*Exogone lourei*  
*Exogone molesta*  
*Flabelliderma papillosa*  
*Flabesymbios commensalis*  
<sup>§</sup>*Halosydna brevisetosa*  
<sup>§</sup>*Halosydna johnsoni*  
<sup>a</sup>*Hydroides elegans*  
*Hydroides gracilis*  
<sup>§</sup>*Lanice conchilega*  
<sup>§</sup>*Lumbrineris* sp.  
*Malmgreniella baschi*  
<sup>§</sup>*Myrianida* sp.  
*Myxicola infundibulum*  
<sup>§</sup>*Naineris* sp.  
<sup>§</sup>*Nereis* spp.

<sup>§</sup>*Nereis grubei*  
*Nereis latescens*  
<sup>§</sup>*Notomastus lineatus*  
<sup>§</sup>*Odontosyllis* sp.  
*Opisthosyllis leslieharrisae*  
*Paraonides* sp.  
<sup>§</sup>*Perinereis monterea*  
*Phragmatopoma californica*  
*Phyllochaetopterus* sp.  
<sup>§</sup>*Phyllochaetopterus prolifica*  
*Phylo felix*  
<sup>§</sup>*Platynereis bicanaliculata*  
*Praxillella affinis pacifica*  
*Prionospio cirrifer*  
*Proceraea gigantea*  
*Protolaeospira eximia*  
*Salmacina tribranchiata*  
<sup>§</sup>*Schistomeringos longicornis*  
*Scolecopsis* sp.  
*Scoletoma zonata*  
<sup>§</sup>*Semiodera inflata*  
*Serpula vermicularis*  
*Spiochaetopterus costarum*  
*Spirobranchus spinosus*  
*Spirorbis* spp.  
<sup>§</sup>*Syllides* sp.  
<sup>§</sup>*Syllis alternata*  
<sup>§</sup>*Syllis fasciata*  
<sup>§</sup>*Syllis hyalina*  
*Synelmis albini*  
*Tharyx* sp.  
*Thelepus crispus*  
<sup>§</sup>*Trophoniella americana*

#### **Arthropoda: Branchiopoda**

*Evadne* sp.  
<sup>§</sup>*Penilia avirostris*

#### **Arthropoda: Hexanauplia**

*Acartia tonsa*  
<sup>§</sup>*Alteutha langi*  
*Anthessius nortoni*  
*Calanus pacificus*  
*Candacia* spp.  
<sup>§</sup>*Candacia bipinnata*  
*Clausocalanus* sp.  
<sup>§</sup>*Clausocalanus furcatus*  
*Corycaeus* sp.  
*Ctenocalanus* sp.  
<sup>§</sup>*Dactylopusia* sp.  
<sup>§</sup>*Diosaccus spinatus*  
<sup>§</sup>*Ditrichocorycaeus amazonicus*  
<sup>§</sup>*Ditrichocorycaeus anglicus*  
*Euchaeta* sp.  
<sup>§</sup>*Eudactylopus* sp.  
*Eupelte* spp.  
<sup>§</sup>*Euterpina acutifrons*  
<sup>§</sup>*Farranula curta*  
*Labidocera* sp.  
<sup>§</sup>*Laophonte* sp.  
*Lucicutia* sp.  
*Microsetella* sp.  
<sup>§</sup>*Microsetella rosea*  
*Oithona* sp.  
<sup>§</sup>*Oithona similis*  
*Oncaea* sp.  
*Paracalanus* sp.  
<sup>§</sup>*Paracalanus parvus parvus*  
*Pollicipes polymerus*  
*Porcellidium* sp.  
*Porcellidium viride*  
*Rhincalanus nasutus*  
*Scutellidium lamellipes*  
*Tetraclita rubescens*  
*Tigriopus californicus*  
*Tisbe* sp.

<sup>§</sup>*Zaus spinatus spinatus*

#### **Arthropoda: Malacostraca**

<sup>§</sup>*Acanthura luna*  
<sup>b</sup>*Aciconula acanthosoma*  
<sup>§</sup>*Alpheus* sp.  
<sup>§</sup>*Alpheus bellimanus*  
<sup>§</sup>*Alpheus clamator*  
*Alpheus dentipes*  
<sup>b</sup>*Amathimysis trigibba*  
*Americhelidium rectipalmum*  
*Ampelisca cristata*  
*Ampelisca lobata*  
*Amphilochus* sp.  
*Ampithoe* spp.  
<sup>§</sup>*Ampithoe pollex*  
<sup>§</sup>*Ampithoe ramondi*  
<sup>§</sup>*Ampithoe sectimana*  
<sup>§</sup>*Ampithoe simulans*  
<sup>§</sup>*Aoroides* spp.  
<sup>§</sup>*Aoroides columbiae*  
<sup>§</sup>*Aoroides exilis*  
*Aoroides spinosus*  
<sup>§</sup>*Apoehale californica*  
*Aruga holmesi*  
*Betaeus* spp.  
*Batea transversa*  
*Cancer* spp.  
<sup>§</sup>*Caprella* sp.  
<sup>§</sup>*Caprella angusta*  
*Caprella californica*  
<sup>§</sup>*Caprella equilibra*  
<sup>§</sup>*Caprella mendax*  
*Caprella pilidigitata*  
<sup>§</sup>*Caprella uniforma*  
<sup>§</sup>*Caprella verrucosa*  
<sup>§</sup>*Ceradocus* sp.  
*Cerapus tubularis*

<sup>§</sup>*Chevalia aviculae*  
*Chevalia inaequalis*  
*Cirolana* spp.  
*Cirolana diminuta*  
*Cirolana harfordi*  
<sup>§</sup>*Cirolana parva*  
<sup>§</sup>*Coboldus hedgpethi*  
*Cumella* spp.  
*Cyathura munda*  
*Cyclaspis nubila*  
<sup>§</sup>*Cycloanthops novemdentatus*  
*Deilocerus planus*  
<sup>§</sup>*Dissiminassa dissimilis*  
*Dynoides elegans*  
<sup>§</sup>*Dynamene glabra*  
<sup>§</sup>*Deutella venenosa*  
*Elasmopus antennatus*  
*Enallopaguropsis guatemoci*  
<sup>§</sup>*Eobrolgus spinosus*  
*Epialtoides hiltoni*  
<sup>a</sup>*Erichthonius brasiliensis*  
*Erileptus spinosus*  
*Erythrops* sp.  
*Eualus subtilis*  
<sup>§</sup>*Euphausia recurva*  
*Eurydice caudata*  
*Eusiroides monoculoides*  
*Excorallana* sp.  
*Excorallana truncata*  
*Exosphaeroma rhomburum*  
<sup>§</sup>*Foxiphalus obtusidens*  
<sup>§</sup>*Gammaropsis thompsoni*  
*Gibberosus falciformis*  
*Gnathia* spp.  
*Gnathopleustes pugettensis*  
<sup>b</sup>*Haigiopagurus diegensis*  
*Hemisquilla californiensis*  
*Hemisquilla ensigera*

<sup>b</sup>*Heptacarpus fuscimaculatus*  
*Heptacarpus palpator*  
<sup>§</sup>*Heptacarpus stimpsoni*  
<sup>§</sup>*Heteromysis* sp.  
*Hippolyte clarki*  
*Holmesimysis sculpta*  
*Hourstonius vilordes*  
*Hyale niger*  
<sup>§</sup>*Hyalella azteca*  
<sup>§</sup>*Hyperliella* sp.  
*Ianiropsis* sp.  
*Ianiropsis kincaidi*  
<sup>§</sup>*Ianiropsis tridens*  
*Janiridae* sp.  
<sup>a, §</sup>*Jassa marmorata*  
*Joeropsis dubia*  
<sup>§</sup>*Leptochelia* sp.  
*Leptochelia dubia*  
*Ligia occidentalis*  
*Limnoria* sp.  
<sup>§</sup>*Liropus minusculus*  
<sup>§</sup>*Lophopanopeus* sp.  
*Lophopanopeus leucomanus*  
*Loxorhynchus* spp.  
*Loxorhynchus grandis*  
*Lysmata californica*  
<sup>§</sup>*Macronassa macromera*  
*Maera* spp.  
<sup>§</sup>*Maera similis*  
*Mayerella banksia*  
*Megalorchestia californiana*  
*Melita* sp.  
<sup>§</sup>*Mesanthura occidentalis*  
*Metaphoxus frequens*  
*Microjassa litotes*  
*Monoculodes* sp.  
*Munna* spp.  
<sup>§</sup>*Nasageneia quinsana*

<sup>§</sup>*Nebalia* sp.  
*Nebalia pugettensis*  
<sup>§</sup>*Oncopagurus haigae*  
*Orchomene* sp.  
*Oregonia gracilis*  
*Pachygrapsus crassipes*  
<sup>b</sup>*Paguristes parvus*  
*Paguristes ulreyi*  
*Pagurus* sp.  
*Pagurus hirsutiusculus*  
*Pagurus samuelis*  
<sup>§</sup>*Pancolus californiensis*  
*Pandalus danae*  
*Panulirus interruptus*  
*Paracerceis* sp.  
*Paracerceis cordata*  
<sup>§</sup>*Paranthura elegans*  
<sup>§</sup>*Paraphoxus oculatus*  
<sup>§</sup>*Parapseudes latifrons*  
*Paraxanthias taylori*  
*Pariphinotus* sp.  
*Pariphinotus escabrosus*  
*Pariphinotus seclusus*  
<sup>§</sup>*Pelia tumida*  
<sup>§</sup>*Pentidotea* sp.  
*Pentidotea resecata*  
*Perotripus brevis*  
<sup>§</sup>*Petrolisthes cabrilloi*  
*Phimochirus californiensis*  
*Photis* spp.  
*Photis brevipes*  
*Pinnixa* sp.  
*Pleusirus securus*  
*Pleuroncodes planipes*  
<sup>§</sup>*Podocerus brasiliensis*  
*Podocerus cristatus*  
<sup>§</sup>*Polycheria osborni*  
<sup>§</sup>*Pontogeneia intermedia*

*Pontogeneia rostrata*  
*Portunus xantusii*  
*Protohyale frequens*  
*Pugettia* spp.  
*Pugettia dalli*  
*Pugettia gracilis*  
*Pugettia producta*  
*Pugettia richii*  
*Rocinela belliceps*  
*Romaleon antennarium*  
*Romaleon jordani*  
*Rudilemboides stenopropodus*  
*Siriella pacifica*  
<sup>b</sup>*Stenorhynchus debilis*  
<sup>§</sup>*Stenosoma wetzeri*  
<sup>§</sup>*Stenothoe* sp.  
<sup>§</sup>*Stenothoe estacola*  
*Sunamphitoe femorata*  
*Sunamphitoe plea*  
<sup>§</sup>*Sunamphitoe tea*  
<sup>§</sup>*Synapseudes intumescens*  
*Synchelidium* sp.  
*Talipeus nuttallii*  
*Tecticeps convexus*  
<sup>§</sup>*Themisto* sp.  
*Thorlaksonius platypus*  
*Thysanoessa spinifera*  
<sup>§</sup>*Tritella laevis*  
*Zeuxo normani*

#### Arthropoda: Ostracoda

*Asteropella slatteryi*  
<sup>§</sup>*Bathyleberis* sp.  
*Conchoecia* sp.  
<sup>§</sup>*Cycloberis* sp.  
*Cycloleberis lobiancoi*  
*Cythereis* sp.  
*Euphilomedes carcharodonta*

<sup>§</sup>*Eusarsiella pseudospinosa*  
*Leuroleberis sharpei*  
*Macrocyprina barbara*  
*Macrocyprina pacifica*  
*Neonesidea phlegeri*  
*Parasterope* sp.  
*Philomedes* sp.  
*Rutiderma* spp.  
<sup>§</sup>*Rutiderma chessi*  
<sup>§</sup>*Rutiderma rotundum*  
*Vargula americana*  
*Vargula tsujii*

#### Arthropoda: Pycnogonida

<sup>§</sup>*Ammotha hilgendorfi*  
<sup>§</sup>*Anoplodactylus viridintestinalis*  
<sup>§</sup>*Pycnogonum stearnsi*

#### Arthropoda: Thecostraca

*Pollicipes polymerus*  
*Balanus* sp.  
*Balanus glandula*  
<sup>§</sup>*Balanus trigonus*  
<sup>§</sup>*Chthamalus* spp.  
*Chthamalus dalli*  
*Chthamalus fissus*  
*Megabalanus californicus*  
*Megabalanus tintinnabulum*

#### Bryozoa: Gymnolaemata

*Aetea anguina*  
<sup>§</sup>*Akatopora tinctoria*  
<sup>§</sup>*Bugula* spp.  
<sup>§</sup>*Bugula minima*  
<sup>a</sup>*Bugula neritina*  
*Bugulina californica*  
<sup>§</sup>*Caberea boryi*  
*Celleporaria brunnea*

*Cradoscrupocellaria bertholletii*  
*Fenestrulina malusii*  
<sup>§</sup>*Jellyella tuberculata*  
*Membranipora* sp.  
*Membranipora membranacea*  
<sup>§</sup>*Microporella ciliata*  
<sup>§</sup>*Penetrantia concharum*  
*Primavelans insculpta*  
*Rhynchozoon rostratum*  
*Rhynchozoon tumulosum*  
*Schizomavella auriculata*  
<sup>§</sup>*Schizoporella cornualis*  
*Thalamoporella californica*  
*Tricellaria* spp.  
<sup>§</sup>*Tricellaria occidentalis*  
<sup>a</sup>*Watersipora subatra*  
<sup>a</sup>*Watersipora subtorquata*

**Bryozoa: Stenolaemata**

<sup>§</sup>*Barentsia* sp.  
<sup>§</sup>*Bicrisia edwardsiana*  
<sup>§</sup>*Crisia* sp.  
<sup>§</sup>*Crisia maxima*  
<sup>§</sup>*Crisulipora occidentalis*  
*Diaperoforma californica*  
<sup>§</sup>*Filicrisia franciscana*  
<sup>§</sup>*Filicrisia geniculata*  
<sup>§</sup>*Neofungella californica*  
*Patinella radiata*  
*Tubulipora* spp.  
*Tubulipora tuba*

**Chaetognatha: Sagittoidea**

<sup>b</sup>*Paraspadella pimukatharos*

**Chordata: Appendicularia**

*Oikopleura* sp.

**Chordata: Ascidiacea**

<sup>§</sup>*Aplidium* sp.  
<sup>§</sup>*Aplidium arenatum*  
*Aplidium californicum*  
*Aplidium propinquum*  
*Aplidium solidum*  
<sup>b</sup>*Botrylloides diegensis*  
*Botryllus* sp.  
*Clavelina huntsmani*  
<sup>§</sup>*Didemnum* spp.  
*Didemnum carnulentum*  
<sup>a</sup>*Diplosoma listerianum*  
*Eudistoma* spp.  
*Eudistoma ritteri*  
*Euherdmania claviformis*  
*Metandrocarpa taylori*  
<sup>§</sup>*Orthopyxis everta*  
<sup>§</sup>*Parasmittina californica*  
*Pyura haustor*  
*Ritterella pulchra*  
*Trididemnum opacum*

**Chordata: Thaliacea**

*Pegea socia*  
*Pyrosoma atlanticum*  
*Thetys vagina*

**Cnidaria: Anthozoa**

<sup>§</sup>*Actinaria* sp.  
<sup>§</sup>*Adelogorgia phyllosclera*  
*Anthopleura elegantissima*  
*Anthopleura sola*  
<sup>§</sup>*Anthopleura xanthogrammica*  
*Astrangia haimeii*  
*Balanophyllia elegans*  
<sup>a</sup>*Bunodeopsis* sp.  
<sup>§</sup>*Coenocyathus bowersi*  
*Corynactis californica*

*Clavularia* sp.  
*Discophyton rudyi*  
<sup>a</sup>, <sup>§</sup>*Diadumene* sp.  
*Epiactis prolifera*  
*Epizoanthus leptoderma*  
*Leptogorgia chilensis*  
<sup>§</sup>*Leptogorgia tricolorata*  
*Muricea californica*  
*Muricea fruticosa*  
*Pachycerianthus fimbriatus*  
*Paracyathus stearnsii*  
<sup>§</sup>*Savalia lucifica*  
<sup>§</sup>*Thrombophyton coronatum*

**Cnidaria: Hydrozoa**

*Abietinaria* spp.  
<sup>§</sup>*Amphisbetia furcata*  
<sup>§</sup>*Antennella avalonia*  
<sup>§</sup>*Calycella syringa*  
<sup>§</sup>*Campanularia volubilis*  
*Cladocoryne floccosa*  
<sup>§</sup>*Clytia linearis*  
<sup>§</sup>*Dynamena disticha*  
<sup>§</sup>*Dynamena quadridentata*  
*Eudendrium* sp.  
*Halecium* spp.  
<sup>§</sup>*Halecium corrugatum*  
<sup>§</sup>*Halecium kofoidi*  
<sup>§</sup>*Hincksella cylindrica*  
<sup>§</sup>*Hydractinia* sp.  
<sup>§</sup>*Hydrodendron* sp.  
<sup>§</sup>*Leuckartiara* sp.  
*Macrorhynchia* sp.  
<sup>§</sup>*Obelia dichotoma*  
*Plumularia* sp.  
<sup>§</sup>*Salacia desmoides*  
*Schuchertinia milleri*  
*Sertularella* spp.

<sup>§</sup>*Sertularella tenella*  
<sup>§</sup>*Sphaerocoryne bedoti*  
<sup>§</sup>*Symmetrosphyphus intermedius*  
*Tubularia* spp.  
<sup>§</sup>*Xingyurella turgida*

**Echinodermata: Asteroidea**

*Astrometis sertulifera*  
*Henricia* spp.  
*Henricia leviuscula*  
*Linckia columbiae*  
*Patiria miniata*  
*Pisaster brevispinus*  
*Pisaster giganteus*  
<sup>§</sup>*Pisaster ochraceus*

**Echinodermata: Echinoidea**

*Centrostephanus coronatus*  
*Dendraster terminalis*  
*Lovenia cordiformis*  
*Lytechinus pictus*  
*Mesocentrotus franciscanus*  
*Strongylocentrotus purpuratus*

**Echinodermata: Holothuroidea**

*Apostichopus californicus*  
*Apostichopus parvimensis*  
<sup>§</sup>*Cucumaria pseudocurata*  
<sup>§</sup>*Cucumaria salma*  
*Leptosynapta albicans*

**Echinodermata: Ophiuroidea**

*Amphipholis* sp.  
*Amphipholis squamata*  
*Amphiodia* sp.  
*Ophiactis* sp.  
<sup>§</sup>*Ophiactis simplex*  
*Ophioderma panamensis*

*Ophionereis annulata*  
*Ophioncus* sp.  
*Ophioplocus esmarki*  
*Ophiopsila californica*  
*Ophiopteris papillosa*  
*Ophiothrix spiculata*

**Mollusca: Bivalvia**

*Americardia biangulata*  
<sup>§</sup>*Ameritella modesta*  
<sup>§</sup>*Anomia peruviana*  
<sup>§</sup>*Brachidontes* sp.  
*Brachidontes adamsianus*  
*Chaceia ovoidea*  
*Chama arcana*  
*Chama pellucida*  
<sup>§</sup>*Chione undatella*  
*Clinocardium nuttallii*  
*Crassadoma gigantea*  
*Crenella decussata*  
*Cryptomya californica*  
<sup>§</sup>*Epilucina californica*  
*Glans carpenteri*  
*Globivenus fordii*  
<sup>§</sup>*Gregariella chenui*  
*Hiatella arctica*  
<sup>§</sup>*Kellia laperousii*  
<sup>§</sup>*Lasaea subviridis*  
*Leiosolenus plumula*  
<sup>§</sup>*Leptopecten* sp.  
<sup>§</sup>*Leptopecten latiauratus*  
<sup>§</sup>*Leukoma staminea*  
*Limaria hemphilli*  
*Liralucina approximata*  
<sup>§</sup>*Milneria minima*  
<sup>§</sup>*Modiolus* spp.  
*Modiolus capax*  
*Mytilisepta bifurcata*

*Mytilus californianus*  
*Mytilus edulis*  
<sup>a, §</sup>*Mytilus galloprovincialis*  
<sup>§</sup>*Mytilus trossulus*  
*Neolepton salmoneum*  
*Neolepton subtrigonum*  
<sup>§</sup>*Parvilucina tenuisculpta*  
*Periploma* sp.  
*Philobrya setosa*  
<sup>§</sup>*Pitar newcombianus*  
*Pododesmus macrochisma*  
*Pseudochama exogyra*  
<sup>b</sup>*Pteria sterna*  
*Scrobicularia* sp.  
<sup>§</sup>*Semele decisa*  
*Semele rupicola*  
<sup>§</sup>*Synelmis albini*  
*Solemya valvulus*  
*Solen rosaceus*  
<sup>§</sup>*Septifer* spp.  
*Tagelus californianus*  
*Tellina* sp.  
<sup>§</sup>*Tresus capax*  
<sup>§</sup>*Zemysina orbelli*

**Mollusca: Cephalopoda**

*Doryteuthis opalescens*  
*Octopus bimaculatus*  
*Octopus bimaculoides*  
*Octopus micropyrsus*  
*Octopus rubescens*

**Mollusca: Gastropoda**

*Acanthina* sp.  
<sup>§</sup>*Acanthinucella* spp.  
<sup>§</sup>*Acanthinucella spirata*  
*Acteocina harpa*  
<sup>§</sup>*Alia* sp.

*Alia carinata*  
<sup>§</sup>*Alvania* spp.  
*Amphissa* sp.  
*Amphissa versicolor*  
*Amphithalamus inclusus*  
*Apata pricei*  
*Aplysia californica*  
*Aplysia vaccaria*  
*Archierato columbella*  
*Atrimitra idae*  
*Barleeia* spp.  
*Barleeia californica*  
<sup>§</sup>*Barleeia haliotiphila*  
<sup>§</sup>*Barleeia subtenuis*  
*Bittium* sp.  
<sup>§</sup>*Bostrycapulus aculeatus*  
*Bulla gouldiana*  
*Caecum californicum*  
<sup>§</sup>*Caecum dextroversum*  
<sup>§</sup>*Caecum orcutti*  
*Caecum quadratum*  
*Californiconus californicus*  
<sup>§</sup>*Caliostoma* sp.  
<sup>§</sup>*Calliostoma annulatum*  
*Calliostoma canaliculatum*  
*Carinaria japonica*  
*Ceratostoma nuttalli*  
*Cerithiopsis* sp.  
<sup>§</sup>*Cerithiopsisidella cosmia*  
*Chrysallida navisa*  
*Corambe pacifica*  
*Crepidula* spp.  
*Crepidula perforans*  
*Crepidatella lingulata*  
<sup>§</sup>*Crossata californica*  
*Cystiscus politus*  
<sup>§</sup>*Delonovola aequalis*  
*Dendrodoris* sp.

*Dendronotus frondosus*  
*Dendropoma* spp.  
*Dendropoma lituella*  
*Dendropoma rastrum*  
<sup>§</sup>*Diaphana californica*  
<sup>§</sup>*Diaulula sandiegensis*  
<sup>§</sup>*Discurria insessa*  
<sup>§</sup>*Diodora* sp.  
*Diodora aspera*  
*Epitonium tinctum*  
*Eubranchus rustyus*  
*Eulithidium pulloides*  
<sup>b</sup>*Felimare californiensis*  
<sup>b</sup>*Felimida galexorum*  
*Fissurella volcano*  
<sup>b</sup>*Flabellina bertschi*  
*Flabellinopsis iodinea*  
<sup>§</sup>*Gibberula subtrigona*  
*Granulina margaritula*  
*Haliotis* sp.  
<sup>c</sup>*Haliotis corrugata*  
<sup>d</sup>*Haliotis cracherodii*  
<sup>c</sup>*Haliotis fulgens*  
*Haminoea virescens*  
*Hermisenda crassicornis*  
*Hesperaptyxis luteopictus*  
*Hipponix panamensis*  
*Hipponix tumens*  
*Homalopoma baculum*  
*Homalopoma luridum*  
<sup>§</sup>*Iselica fenestrata*  
*Iselica ovoidea*  
*Kelletia kelletii*  
*Lacuna* spp.  
*Lacuna unifasciata*  
*Limacia cockerelli*  
*Limacia mcdonaldii*  
<sup>§</sup>*Liotia fenestrata*

*Lirobittium attenuatum*  
*Lirularia* spp.  
<sup>‡</sup>*Lirularia succincta*  
*Littorina* spp.  
*Littorina keenae*  
*Littorina plena*  
*Littorina scutulata*  
*Lottia asmi*  
*Lottia austrodigitalis*  
*Lottia conus*  
*Lottia digitalis*  
*Lottia gigantea*  
*Lottia instabilis*  
*Lottia limatula*  
*Lottia paradigitalis*  
*Lottia pelta*  
*Lottia scabra*  
<sup>‡</sup>*Lottia scutum*  
*Lottia strigatella*  
<sup>‡</sup>*Lucapinella callomarginata*  
<sup>‡</sup>*Marginella* sp.  
*Maxwellia* spp.  
*Maxwellia gemma*  
*Maxwellia santarosana*  
*Megastraea undosa*  
*Megathura crenulata*  
*Melanella thersites*  
*Melibe leonina*  
*Mitrella aurantiaca*  
*Mitrella tuberosa*  
*Mitromorpha carpenteri*  
<sup>‡</sup>*Nassarius tiarula*  
*Navanax inermis*  
*Neobernaya spadicea*  
*Neostylidium eschrichtii*  
*Norrisia norrisii*  
*Nucella emarginata*  
*Nucella ostrina*

*Ocenebra* spp.  
*Ocenebra edwardsii*  
*Odostomia aequisculpta*  
<sup>‡</sup>*Odostomia helga*  
<sup>‡</sup>*Odostomia nivea*  
<sup>‡</sup>*Odostomia nota*  
*Odostomia virginalis*  
*Okenia rosacea*  
*Olivella biplicata*  
*Opalia funiculata*  
*Paciocinebrina atropurpurea*  
*Paciocinebrina circumtexta*  
*Paciocinebrina foveolata*  
*Paciocinebrina interfossa*  
<sup>‡</sup>*Paciocinebrina lurida*  
*Parviturbo acuticostatus*  
*Peltodoris mullineri*  
*Petalocochnus* spp.  
*Petalocochnus montereyensis*  
<sup>‡</sup>*Polinices* sp.  
<sup>b</sup>*Polycera alabe*  
*Polycera tricolor*  
<sup>‡</sup>*Pomaulax gibberosus*  
<sup>‡</sup>*Plesiocystiscus jewettii*  
<sup>‡</sup>*Pseudodiala acuta*  
*Pseudopusula californiana*  
*Pteropurpura festiva*  
*Pteropurpura trialata*  
<sup>‡</sup>*Pusula solandri*  
<sup>‡</sup>*Rissoella* sp.  
*Rissoina* sp.  
*Seila montereyensis*  
<sup>‡</sup>*Sinezona beddomei*  
<sup>‡</sup>*Sinezona rimuloides*  
*Tectarius striatus*  
*Tegula aureotincta*  
*Tegula brunnea*  
*Tegula eiseni*

*Tegula funebris*  
<sup>‡</sup>*Tegula gallina*  
<sup>‡</sup>*Tegula regina*  
*Thylacodes squamigerus*  
*Tricolia retrolineata*  
*Triphora pedroana*  
*Trivia* spp.  
<sup>‡</sup>*Turbonilla kelseyi*  
*Tylodina fungina*  
<sup>a, ‡</sup>*Urosalpinx cinerea*  
*Volvarina taeniolata*  
*Zanassarina penicillata*

### **Mollusca: Polyplacophora**

<sup>‡</sup>*Callistochiton* sp.  
*Cyanoplax* spp.  
*Cyanoplax dentiens*  
*Cyanoplax hartwegii*  
*Cyanoplax keepiana*  
<sup>‡</sup>*Lepidozona* spp.  
*Lepidozona cooperi*  
*Lepidozona pectinulata*  
<sup>‡</sup>*Mopalia* spp.  
*Mopalia acuta*  
*Mopalia muscosa*  
*Nuttallina* spp.  
*Nuttallina californica*  
*Stenoplax conspicua*  
*Stenoplax heathiana*

### **Nemertea: Hoplonemertea**

<sup>‡</sup>*Emplectonema gracile*  
<sup>‡</sup>*Paranemertes peregrina*

### **Nemertea: Trematoda**

<sup>‡</sup>*Amphimerus* sp.

### **Phoronida**

<sup>‡</sup>*Phoronis ijimai*  
*Phoronopsis californica*  
**Platyhelminthes**  
<sup>‡</sup>*Hylocelis californica*  
<sup>‡</sup>*Notoplana* sp.  
<sup>‡</sup>*Thysanozoon californicum*

### **Porifera: Calcarea**

*Clathrina blanca*  
*Clathrina clathrus*  
*Clathrina coriacea*  
<sup>‡</sup>*Clathrina macleaya*  
<sup>‡</sup>*Leucandra apicalis*  
*Leucandra heathi*  
*Leucandra losangelensis*  
*Leucilla nuttingi*  
<sup>‡</sup>*Leucosolenia* sp.  
*Leucosolenia nautilia*  
<sup>‡</sup>*Sycon coactum*

### **Porifera: Demospongiae**

*Acanthancora cyanocrypta*  
*Acarnus erithacus*  
*Antho karykina*  
<sup>‡</sup>*Antho lithophoenix*  
*Aplysina fistularis*  
*Aplysilla glacialis*  
*Aplysilla polyraphis*  
*Callyspongia californica*  
*Clathria asodes*  
*Clathria parthena*  
*Clathria pennata*  
*Cliona viridis*  
<sup>‡</sup>*Cyamon catalina*  
*Cyamon koltuni*  
*Cyamon neon*  
*Dragmacidon mexicanum*  
*Dysidea amblia*

*Dysidea fragilis*  
*Geodia gibberosa*  
*Geodia hentscheli*  
*Halichondria panicea*  
*Haliclona* spp.  
*Haliclona ambrosia*  
*Haliclona cinerea*  
*Hymedesmia arndti*  
*Hymedesmia levis*  
<sup>a</sup>*Hymeniacidon sinapium*  
<sup>§</sup>*Lissodendoryx noxiosa*  
<sup>§</sup>*Lissodendoryx topsenti*  
<sup>§</sup>*Neopetrosia zumi*  
<sup>§</sup>*Oxeostilon fernaldi*  
*Pachastrella dilifera*  
*Penares cortius*  
<sup>§</sup>*Plocamiancora igzo*  
*Smenospongia aurea*  
*Stelletta clarella*  
*Stelletta estrella*  
*Tethya aurantium*  
*Tethya californiana*  
<sup>§</sup>*Timea authia*  
<sup>§</sup>*Topsentia fernaldi*  
<sup>§</sup>*Trikentrion catalina*

**Sipuncula: Sipunculidea**  
*Golfingia* sp.

**Sipuncula: Phascolosomatidea**  
*Apionsoma murinae murinae*  
<sup>§</sup>*Phascolosoma agassizii*

**IV. Bony and Cartilaginous Fishes**

**Vertebrata: Actinopterygii**  
*Alloclinus holderi*  
*Anisotremus davidsonii*

<sup>b, §</sup>*Apogon guadalupensis*  
<sup>b, §</sup>*Apogon pacificus*  
*Atherinops affinis*  
<sup>§</sup>*Artedius corallinus*  
*Atractoscion nobilis*  
<sup>a</sup>*Azurina hirundo*  
<sup>b</sup>*Balistes polylepis*  
*Brachyistius frenatus*  
*Caulolatilus princeps*  
<sup>a</sup>*Chaenopsis alepidota*  
*Cheilopogon pinnatibarbatus*  
*pinnatibarbatus*  
*Chilara taylora*  
*Chromis punctipinnis*  
*Citharichthys sordidus*  
<sup>§</sup>*Citharichthys stigmatæus*  
*Clinocottus analis*  
*Cosmocampus arctus arctus*  
*Cymatogaster aggregata*  
<sup>§</sup>*Decapterus muroadsi*  
*Embiotoca jacksoni*  
*Embiotoca lateralis*  
*Engraulis mordax*  
*Gibbonsia elegans*  
*Gibbonsia montereyensis*  
*Girella nigricans*  
<sup>§</sup>*Gobiesox maeandricus*  
*Gobiesox rhessodon*  
*Gymnothorax mordax*  
*Halichores californica*  
*Halichoeres semicinctus*  
*Hermosilla azurea*  
*Heterostichus rostratus*  
*Hippoglossus stenolepis*  
*Hyperprosopon argenteum*  
*Hypsoblennius jenkinsi*  
*Hypsurus caryi*  
*Hypsypops rubicundus*

<sup>§</sup>*Kyophiosus azureus*  
<sup>b</sup>*Labrisomus xanti*  
*Leiocottus hirundo*  
*Leuresthes tenuis*  
*Lythrypnus dalli*  
*Lythrypnus zebra*  
*Medialuna californiensis*  
<sup>§</sup>*Mola mola*  
*Ophiodon elongatus*  
*Orthonopias triacis*  
*Oxyjulis californica*  
*Oxylebius pictus*  
*Paralabrax clathratus*  
*Paralabrax maculatofasciatus*  
*Paralabrax nebulifer*  
*Paraclinus integripinnis*  
*Paralichthys californicus*  
*Phanerodon furcatus*  
*Pleuronichthys coenosus*  
*Prognathodes falcifer*  
*Regalecus russelii*  
*Rhacochilus toxotes*  
*Rhacochilus vacca*  
*Rhinogobiops nicholsii*  
*Rimicola eigenmanni*  
*Rimicola muscarum*  
*Ruscarius creaseri*  
<sup>§</sup>*Sarda chiliensis*  
*Sardinops sagax*  
<sup>§</sup>*Scomber japonicus*  
*Scorpaena guttata*  
*Scorpaenichthys marmoratus*  
<sup>b</sup>*Scorpaenodes xyris*  
*Sebastes atrovirens*  
*Sebastes rastrelliger*  
*Sebastes serranoides*  
*Sebastes serriceps*  
*Semicossyphus pulcher*

*Seriola lalandi*  
*Seriphus politus*  
*Sphyræna argentea*  
<sup>c</sup>*Stereolepis gigas*  
*Syngnathus* sp.  
*Trachipterus altivelis*  
*Trachurus symmetricus*  
<sup>a</sup>*Tridentiger trigonocephalus*  
<sup>§</sup>*Typhlogobius californiensis*  
*Umbrina roncadore*  
*Xenistius californiensis*

**Vertebrata: Elasmobranchii**

*Carcharodon carcharias*  
*Cephaloscyllium ventriosum*  
*Galeorhinus galeus*  
*Heterodontus francisci*  
*Myliobatis californica*  
*Prionace glauca*  
*Pseudobatos productus*  
<sup>§</sup>*Pteroplatytrygon violacea*  
*Squatina californica*  
*Tetronarce californica*  
*Triakis semifasciata*  
*Urolophus halleri*
